# Supplementary material for: Mechanistic studies on proton transfer in a [FeFe] hydrogenase mimic complex
Source: Royal Society of Chemistry journal article supplement (doi:10.1039/c3dt33087g), 2013-01-01
Supplement: c3dt33087g.pdf [file c3dt33087g.pdf]

## Mechanistic Studies on Proton Transfer in Diiron Dithiolate Complex

Ying Wang and Mårten S. G. Ahlquist\*

Division of Theoretical Chemistry & Biology, School of Biotechnology, KTH Royal Institute of Technology, 106 91 Stockholm, Sweden.

### Computational studies

All Density Functional Theory (DFT) calculations were carried out with Jaguar 7.6 program package by Schrödinger LLC. For geometry optimizations, solvation energy, and frequency calculations, Becke's three-parameter hybrid functional and the LYP correlation functional (B3LYP)<sup>i</sup> was used with the LACVP\*\* core potential and basis set, while single point energy corrections were performed with the M06<sup>ii</sup> functional using the LACV3P\*\*++ basis set which, as suggested by Martin,<sup>iii</sup> was augmented with two f-polarization functions on Fe. Frequency calculations were performed on the optimized geometries to verify that the geometries correspond to minima or first-order saddle points (transition states) on the potential energy surface (PES). The Gibbs free energies were defined as the following equation  $G = E(\text{M06/LACV3P**++ 2f on Fe}) + G_{\text{solv}} + \text{ZPE} + H_{298} + TS_{298}$ . The enthalpic energies were defined as the following equation  $H = E(\text{M06/LACV3P**++ 2f on Fe}) + G_{\text{solv}} + \text{ZPE} + H_{298}$ . The entropic energies were defined as  $S = TS_{298}$ . Based on the gas-phase-optimized structures, the effect of solvent was evaluated by single-point calculations using the Poisson-Boltzmann reactive field implemented in Jaguar 7.6 (PBF)<sup>iv</sup> in dichloromethane.

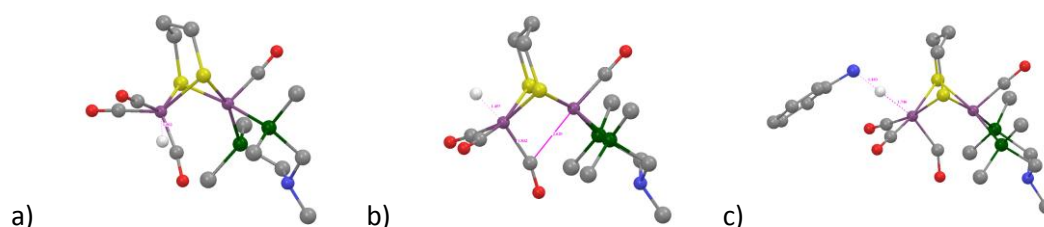

Figure S1. Optimized geometries of a) **ts1** [**1(HFe)**]<sup>1+</sup>; b) [**1(HFe)**]<sup>1+</sup>; c) **ts2** [**1-HFe-aniline**]<sup>1+</sup>. Hydrogen atoms except the migrating H are omitted for clarity. (Purple = Fe; Red = O; Blue = N; Green = P; Yellow = S; Grey = C; White = H). The bond lengths are given in Å.

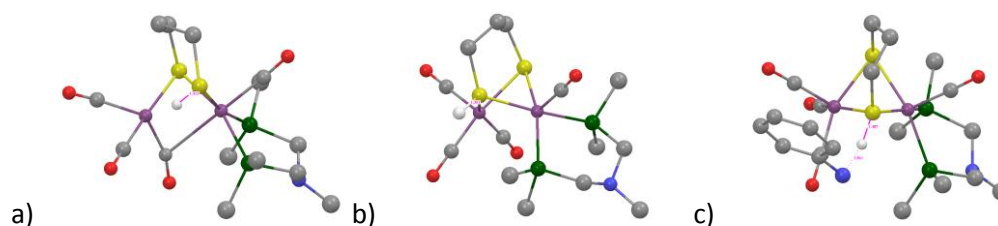

Figure S2. Optimized geometries of a) **ts1** [**1(H<sub>S</sub>)**]<sup>1+</sup>; b) [**1(H<sub>S</sub>)**]<sup>1+</sup>; c) **ts2** [**1-H<sub>S</sub>-aniline**]<sup>1+</sup>. Hydrogen atoms except the migrating H are omitted for clarity. (Purple = Fe; Red = O; Blue = N; Green = P; Yellow = S; Grey = C; White = H). The bond lengths are given in Å.

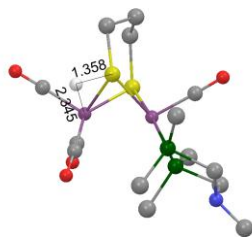

Figure S3. Optimized geometries of **ts1** [**1(H<sub>Fe-S</sub>)**]<sup>1+</sup>. Hydrogen atoms except the migrating H are omitted for clarity. (Purple = Fe; Red = O; Blue = N; Green = P; Yellow = S; Grey = C; White = H). Hydrogen atoms except the migrating H are omitted for clarity. The bond lengths are given in Å.

**Cartesian coordinates in Å and energies in atomic units unless stated otherwise of the calculated geometries.**

Cartesian coordinates of **Figure S1a**

**E (M06/LACV3P\*\*++ 2f(Fe)) = -2630.39307680883**

**ZPE (kcal mol<sup>-1</sup>) = 244.491**

**G<sub>solv</sub> = -0.0584488**

**DH<sub>298</sub> (kcal mol<sup>-1</sup>) = 21.354**

**DS<sub>298</sub> (cal K<sup>-1</sup> mol<sup>-1</sup>) = 202.816**

| atom | x             | y            | z             |
|------|---------------|--------------|---------------|
| S1   | -6.1301237344 | 3.4884874766 | -1.4042014392 |
| Fe2  | -5.8393005397 | 1.3080974896 | -2.0117239565 |
| S3   | -7.9857838061 | 0.9534398593 | -1.2628280960 |
| Fe4  | -6.7158241030 | 2.0609107897 | 0.4022031993  |
| O5   | -6.6540162865 | 4.6173237586 | 1.8797235344  |
| C6   | -6.6902223996 | 3.6414728329 | 1.2817215253  |
| O7   | -4.0906635593 | 1.2279288082 | 1.3423638901  |
| C8   | -5.0865485946 | 1.5875656241 | 0.8797239134  |
| O9   | -8.9387055659 | 1.2806136420 | 2.1867565055  |
| C10  | -8.0949027009 | 1.6021292210 | 1.4832716688  |
| O11  | -6.5583190043 | 1.3725774507 | -4.8206251596 |
| C12  | -6.2388336879 | 1.3327343183 | -3.7127536726 |
| C13  | -7.6944248675 | 4.2486197077 | -2.0433295609 |
| H14  | -7.6445085395 | 5.2967688307 | -1.7364982919 |
| H15  | -7.6087225284 | 4.2137794773 | -3.1343755463 |
| C16  | -9.0030475719 | 3.6227179349 | -1.5754691744 |
| H17  | -9.8253932804 | 4.2048276601 | -2.0130031912 |
| H18  | -9.0979919811 | 3.7229602221 | -0.4887639019 |

|     |                |               |               |
|-----|----------------|---------------|---------------|
| C19 | -9.1920900570  | 2.1657328331  | -1.9786535983 |
| H20 | -9.1371168919  | 2.0436747623  | -3.0652432054 |
| H21 | -10.1717036453 | 1.8077356878  | -1.6511393695 |
| N22 | -2.6984712623  | -0.8064466579 | -2.3000242807 |
| C23 | -1.4749095881  | -1.6200831753 | -2.2670638528 |
| H24 | -1.6299495623  | -2.4824991795 | -1.6135350531 |
| H25 | -1.1694468568  | -1.9852617925 | -3.2617728286 |
| H26 | -0.6569120486  | -1.0278682304 | -1.8487028391 |
| C27 | -3.8590272510  | -1.5705644795 | -2.7484651671 |
| H28 | -3.7405772466  | -2.6154700681 | -2.4445710675 |
| H29 | -3.9767928662  | -1.5671782157 | -3.8480331080 |
| C30 | -2.5241243442  | 0.4238183910  | -3.0660556879 |
| H31 | -2.7166622123  | 0.2856559607  | -4.1463749855 |
| H32 | -1.4884652220  | 0.7643054291  | -2.9684460093 |
| P33 | -5.4498898264  | -0.9786467816 | -1.9773745343 |
| P34 | -3.6004780973  | 1.8155886978  | -2.4464463982 |
| C35 | -6.7015525695  | -1.9878169272 | -2.8769113375 |
| H36 | -6.7563462087  | -1.6750550547 | -3.9230945261 |
| H37 | -6.4501835492  | -3.0519845202 | -2.8356410836 |
| H38 | -7.6828996885  | -1.8367356820 | -2.4212477112 |
| C39 | -5.3886534329  | -1.7734431605 | -0.3131777909 |
| H40 | -5.2395246739  | -2.8529968342 | -0.4141745352 |
| H41 | -4.5660329834  | -1.3525800243 | 0.2690676402  |
| H42 | -6.3283798099  | -1.6018994850 | 0.2176835292  |
| C43 | -3.4302467285  | 3.0508100102  | -3.8052840443 |
| H44 | -3.9180710511  | 2.6916449900  | -4.7148517172 |
| H45 | -3.9067401555  | 3.9861240738  | -3.5018136739 |
| H46 | -2.3759544808  | 3.2471791048  | -4.0221675853 |
| C47 | -2.5664625587  | 2.5550056691  | -1.1099797769 |
| H48 | -1.6197710784  | 2.9079418565  | -1.5302936087 |
| H49 | -3.0858167011  | 3.4030230825  | -0.6568669204 |
| H50 | -2.3630499364  | 1.8121091871  | -0.3374186692 |
| H52 | -6.4649423632  | 0.6143201828  | 0.7199829835  |

Cartesian coordinates of **Figure S1b**

**E (M06/LACV3P\*\*++ 2f(Fe)) = -2630.42542590131**

**ZPE (kcal mol<sup>-1</sup>) = 246.006**

**G<sub>solv</sub> = -0.0582507**

**DH<sub>298</sub> (kcal mol<sup>-1</sup>) = 21.353**

**DS<sub>298</sub> (cal K<sup>-1</sup> mol<sup>-1</sup>) = 202.554**

| atom | x             | y            | z             |
|------|---------------|--------------|---------------|
| S1   | -5.9415680941 | 3.4256163874 | -1.5147724437 |
| Fe2  | -5.6989238574 | 1.2035964773 | -2.0786187880 |
| S3   | -7.7947604281 | 0.8893838186 | -1.1725143512 |
| Fe4  | -6.4823571189 | 2.1045283322 | 0.3546078041  |

|     |               |               |               |
|-----|---------------|---------------|---------------|
| O5  | -4.0968483507 | 0.4311737795  | 0.8292384344  |
| C6  | -4.9977630941 | 1.0344914148  | 0.4402006899  |
| O7  | -5.3586806277 | 4.2513552647  | 2.0188710318  |
| C8  | -5.7628930437 | 3.3911075977  | 1.3839408551  |
| O9  | -7.9399499277 | 0.7103507051  | 2.4931802965  |
| C10 | -7.3372689634 | 1.2312836276  | 1.6734540642  |
| O11 | -6.3282442750 | 1.2773172648  | -4.9078366739 |
| C12 | -6.0767824716 | 1.2473938767  | -3.7824254926 |
| N13 | -2.6814361546 | -1.0460312633 | -2.4372568579 |
| C14 | -1.4925819723 | -1.9112101319 | -2.4142117056 |
| H15 | -1.6895043965 | -2.7825587937 | -1.7843336909 |
| H16 | -1.1935112478 | -2.2639543783 | -3.4154267439 |
| H17 | -0.6541536096 | -1.3648645124 | -1.9745232923 |
| C18 | -3.8655894836 | -1.7547447445 | -2.9154845804 |
| H19 | -3.7931668004 | -2.8085179500 | -2.6281087944 |
| H20 | -3.9628426184 | -1.7297232212 | -4.0169769750 |
| C21 | -2.4440479885 | 0.1913144633  | -3.1759410067 |
| H22 | -2.6335983309 | 0.0845423283  | -4.2604197096 |
| H23 | -1.3937271085 | 0.4789898542  | -3.0650060748 |
| P24 | -5.4530545811 | -1.1147079742 | -2.1713096011 |
| P25 | -3.4529372501 | 1.6286553431  | -2.5432490782 |
| C26 | -6.7232111531 | -1.9374979859 | -3.2227146499 |
| H27 | -6.7048897620 | -1.5313104228 | -4.2370284989 |
| H28 | -6.5476852825 | -3.0165765360 | -3.2692283436 |
| H29 | -7.7119595385 | -1.7578949217 | -2.7938865999 |
| C30 | -5.5714622048 | -2.0554821575 | -0.5884348051 |
| H31 | -5.6380254828 | -3.1269869978 | -0.7999482965 |
| H32 | -4.6898167122 | -1.8667336593 | 0.0261601328  |
| H33 | -6.4648740920 | -1.7521402502 | -0.0363896151 |
| C34 | -3.2156335435 | 2.8757841652  | -3.8790093426 |
| H35 | -3.7201167832 | 2.5596177079  | -4.7953135388 |
| H36 | -3.6431432005 | 3.8285549034  | -3.5577101914 |
| H37 | -2.1516862215 | 3.0185596441  | -4.0911205549 |
| C38 | -2.4049353936 | 2.2970311551  | -1.1793888380 |
| H39 | -1.4452161128 | 2.6341530345  | -1.5825691979 |
| H40 | -2.9025896558 | 3.1468625215  | -0.7049652094 |
| H41 | -2.2260642022 | 1.5236718919  | -0.4306582061 |
| C42 | -7.5462390983 | 4.1686292702  | -2.0660990309 |
| H43 | -7.9532007678 | 4.6834631647  | -1.1919349860 |
| H44 | -7.2591596396 | 4.9289709160  | -2.7979071447 |
| C45 | -9.0648317441 | 2.0899350058  | -1.7864843438 |
| H46 | -9.7834331669 | 1.4729186362  | -2.3333005087 |
| H47 | -9.5664578697 | 2.4760058371  | -0.8953326135 |
| C48 | -8.5658523985 | 3.2176536759  | -2.6836135349 |

|     |               |              |               |
|-----|---------------|--------------|---------------|
| H49 | -9.4409704532 | 3.8189929546 | -2.9661401543 |
| H50 | -8.1701149677 | 2.8034514037 | -3.6152970998 |
| H53 | -7.6695906493 | 2.9966125999 | 0.5464454520  |

Cartesian coordinates of **Figure S1c**

**E (M06/LACV3P\*\*++ 2f(Fe)) = -2917.88608062108**

**ZPE (kcal mol<sup>-1</sup>) = 318.968**

**G<sub>solv</sub> = -0.0642833**

**DH<sub>298</sub> (kcal mol<sup>-1</sup>) = 25.27**

**DS<sub>298</sub> (cal K<sup>-1</sup> mol<sup>-1</sup>) = 233.571**

| atom | x             | y             | z             |
|------|---------------|---------------|---------------|
| S1   | -6.1179447763 | 3.6242458167  | -1.6568658308 |
| Fe2  | -5.7582888040 | 1.3340048733  | -2.0595816568 |
| S3   | -8.0939524282 | 1.1349552753  | -1.8647001787 |
| Fe4  | -7.1284540147 | 2.2524663635  | -0.0439699191 |
| O5   | -5.0028085029 | 0.5454633552  | 0.9272580107  |
| C6   | -5.6942583933 | 1.1324713886  | 0.1954831083  |
| O7   | -6.1856450747 | 4.1514596967  | 1.9704323783  |
| C8   | -6.5672255017 | 3.3964047563  | 1.1910983735  |
| O9   | -8.9091623478 | 0.7176649459  | 1.6865584926  |
| C10  | -8.1846257905 | 1.3176713800  | 1.0203575611  |
| O11  | -5.5485586738 | 1.3593666856  | -4.9646727989 |
| C12  | -5.6467709920 | 1.3636522441  | -3.8138483032 |
| N13  | -2.8176369514 | -1.0058974562 | -1.7068032099 |
| C14  | -1.6940230704 | -1.9096035202 | -1.4252326304 |
| H15  | -2.0581567136 | -2.7838549311 | -0.8791756119 |
| H16  | -1.1766991885 | -2.2572846685 | -2.3358892705 |
| H17  | -0.9671024296 | -1.3986734535 | -0.7883322255 |
| C18  | -3.8756805829 | -1.6679935045 | -2.4645561590 |
| H19  | -3.9051458711 | -2.7265099025 | -2.1868125458 |
| H20  | -3.7042937661 | -1.6287221084 | -3.5571042578 |
| C21  | -2.3769154811 | 0.2341678540  | -2.3394762242 |
| H22  | -2.3041088051 | 0.1468891854  | -3.4402301485 |
| H23  | -1.3754532300 | 0.4849287521  | -1.9752191505 |
| P24  | -5.5803574832 | -0.9866135398 | -2.1174971052 |
| P25  | -3.4637946398 | 1.7004113978  | -1.9414129978 |
| C26  | -6.5658069990 | -1.7735063961 | -3.4625182798 |
| H27  | -6.2822717027 | -1.3661905133 | -4.4359897466 |
| H28  | -6.4115460991 | -2.8568591316 | -3.4716061440 |
| H29  | -7.6253129352 | -1.5666896513 | -3.2946138828 |
| C30  | -6.1075207576 | -1.9480138178 | -0.6345216243 |
| H31  | -6.1310308974 | -3.0154605303 | -0.8739025835 |
| H32  | -5.4116313048 | -1.7754851015 | 0.1875284352  |
| H33  | -7.1070650288 | -1.6341058467 | -0.3228188154 |
| C34  | -2.8552540657 | 2.9446608682  | -3.1579993554 |

|     |                |              |               |
|-----|----------------|--------------|---------------|
| H35 | -3.1212654516  | 2.6504742469 | -4.1760420742 |
| H36 | -3.3199127302  | 3.9093926772 | -2.9418336896 |
| H37 | -1.7681687318  | 3.0505307898 | -3.0912037135 |
| C38 | -2.7492112932  | 2.3200755612 | -0.3587349697 |
| H39 | -1.7050326399  | 2.6090419129 | -0.5116956594 |
| H40 | -3.3100842931  | 3.1925557847 | -0.0137246778 |
| H41 | -2.8025310742  | 1.5421283194 | 0.4040362904  |
| C42 | -7.4084386820  | 4.3624982808 | -2.7561761314 |
| H43 | -8.0730521066  | 4.9345699372 | -2.0998773458 |
| H44 | -6.8735860063  | 5.0876316713 | -3.3761480805 |
| C45 | -9.0123195959  | 2.3413691564 | -2.9264216411 |
| H46 | -9.5415280480  | 1.7262963715 | -3.6597855761 |
| H47 | -9.7736933645  | 2.7950920389 | -2.2829016385 |
| C48 | -8.2032335255  | 3.4144336443 | -3.6478112847 |
| H49 | -8.9093138125  | 4.0227333974 | -4.2309765252 |
| H50 | -7.5374931049  | 2.9487316220 | -4.3779959964 |
| H53 | -8.5256094876  | 3.2710226102 | 0.2002223916  |
| C53 | -9.8234520448  | 5.6154953473 | 4.3265110400  |
| C54 | -9.3566104072  | 6.4048111350 | 3.2741599848  |
| C55 | -9.3417934873  | 5.9053158710 | 1.9724945849  |
| C56 | -9.8012258112  | 4.6091307612 | 1.7308837169  |
| C57 | -10.2687585330 | 3.8096826077 | 2.7765945296  |
| C58 | -10.2801997261 | 4.3209121591 | 4.0740805030  |
| H59 | -9.8342224193  | 6.0085870731 | 5.3382245178  |
| H60 | -9.0033470776  | 7.4136116780 | 3.4638111848  |
| H61 | -8.9770708170  | 6.5214799246 | 1.1540181549  |
| H62 | -10.6192759824 | 2.7993220020 | 2.5830470096  |
| H63 | -10.6483009286 | 3.7035893943 | 4.8877861806  |
| H64 | -10.4809999230 | 3.4086407040 | 0.2060096569  |
| N64 | -9.7191574621  | 4.0578480922 | 0.3993202105  |
| H65 | -9.7254604764  | 4.7842068713 | -0.3143484747 |

Cartesian coordinates of **Figure S2a**

**E (M06/LACV3P\*\*++ 2f(Fe)) = -2630.37402261872**

**ZPE (kcal mol<sup>-1</sup>) = 242.682**

**G<sub>solv</sub> = -0.0604903**

**DH<sub>298</sub> (kcal mol<sup>-1</sup>) = 22.035**

**DS<sub>298</sub> (cal K<sup>-1</sup> mol<sup>-1</sup>) = 210.5**

| atom | x             | y            | z             |
|------|---------------|--------------|---------------|
| S1   | -6.6984572717 | 4.4479332749 | -1.6876672394 |
| Fe2  | -5.7145790416 | 1.0236912031 | -1.7113012044 |
| S3   | -7.8521643226 | 1.1080334981 | -0.8511629266 |
| Fe4  | -6.3955813844 | 2.7223984543 | 0.0194474147  |

|     |                |               |               |
|-----|----------------|---------------|---------------|
| O5  | -8.4276515555  | 3.9708658263  | 1.8078244071  |
| C6  | -7.6400989033  | 3.4828017588  | 1.1399307783  |
| O7  | -4.0839712498  | 4.3696704953  | 0.7991024615  |
| C8  | -4.9901893847  | 3.7339885496  | 0.4987983728  |
| O9  | -5.4316934562  | 0.5945295096  | 1.8026320772  |
| C10 | -5.8047701987  | 1.4037260567  | 1.0729608038  |
| O11 | -6.2990825054  | 1.3829903879  | -4.5249726261 |
| C12 | -6.0559368130  | 1.2269011843  | -3.4068776672 |
| C13 | -8.1587135964  | 4.0367000606  | -2.7317250178 |
| H14 | -8.4896483760  | 5.0299430440  | -3.0505034625 |
| H15 | -7.8252229115  | 3.5043890132  | -3.6267441966 |
| C16 | -9.3178072551  | 3.2992999930  | -2.0593269445 |
| H17 | -10.2200853734 | 3.4821951209  | -2.6586321482 |
| H18 | -9.5182864990  | 3.7183695985  | -1.0681268039 |
| C19 | -9.1584665565  | 1.7826546803  | -1.9867817479 |
| H20 | -8.9648425462  | 1.3676911884  | -2.9801872848 |
| H21 | -10.0798312631 | 1.3315879579  | -1.6095810378 |
| N22 | -2.9046932827  | -1.2962595109 | -2.6442752848 |
| C23 | -1.7968471019  | -2.1928416084 | -3.0078637208 |
| H24 | -1.9749208386  | -3.1833933781 | -2.5812554939 |
| H25 | -1.6682781970  | -2.2993535096 | -4.0978184840 |
| H26 | -0.8649110351  | -1.8094909006 | -2.5846655113 |
| C27 | -4.1942449962  | -1.8267649590 | -3.0797839879 |
| H28 | -4.1793204438  | -2.9173582314 | -2.9819633494 |
| H29 | -4.4216124637  | -1.6004572614 | -4.1387348942 |
| C30 | -2.6657625730  | 0.0776059408  | -3.0889197190 |
| H31 | -3.0035139620  | 0.2621528657  | -4.1253528424 |
| H32 | -1.5892980559  | 0.2749546998  | -3.0638695791 |
| P33 | -5.6102548864  | -1.2149341914 | -2.0357408751 |
| P34 | -3.4751365518  | 1.3224928403  | -1.9611147543 |
| C35 | -7.0700943440  | -2.0279340189 | -2.8037922838 |
| H36 | -7.2559182466  | -1.6113083734 | -3.7972600073 |
| H37 | -6.9149433490  | -3.1075988696 | -2.8924246614 |
| H38 | -7.9479606038  | -1.8435877977 | -2.1798640939 |
| C39 | -5.3889629652  | -2.0833555667 | -0.4276040364 |
| H40 | -5.4162152477  | -3.1675691066 | -0.5774721187 |
| H41 | -4.4261488291  | -1.8105728287 | 0.0093110136  |
| H42 | -6.1870444977  | -1.8007818195 | 0.2628781603  |
| C43 | -2.9664855432  | 2.9290021453  | -2.7028253710 |
| H44 | -3.4430515494  | 3.0611532477  | -3.6775428154 |
| H45 | -3.2834185434  | 3.7516470803  | -2.0580264910 |
| H46 | -1.8799324273  | 2.9733000363  | -2.8254789172 |
| C47 | -2.4489970412  | 1.1818097059  | -0.4346641669 |
| H48 | -1.3914279187  | 1.3246121708  | -0.6790191561 |



|     |               |              |               |
|-----|---------------|--------------|---------------|
| H49 | -2.7424857423 | 1.9371075494 | 0.2961695292  |
| H50 | -2.5767924596 | 0.1904199835 | 0.0051209875  |
| H52 | -5.9053806158 | 2.9295147302 | -1.5686955886 |

Cartesian coordinates of **Figure S2b**

**E (M06/LACV3P\*\*++ 2f(Fe)) = -2630.40607168213**

**ZPE (kcal mol<sup>-1</sup>) = 246.077**

**G<sub>solv</sub> = -0.0648938**

**DH<sub>298</sub> (kcal mol<sup>-1</sup>) = 21.748**

**DS<sub>298</sub> (cal K<sup>-1</sup> mol<sup>-1</sup>) = 207.879**

| atom | x             | y             | z             |
|------|---------------|---------------|---------------|
| S1   | -6.3224479856 | 3.2982084515  | -1.7686394726 |
| Fe2  | -5.6638464630 | 1.1251445713  | -2.0637459096 |
| S3   | -7.7231149925 | 0.7991458401  | -1.0027754966 |
| Fe4  | -6.3488516447 | 2.2493149764  | 0.2307771711  |
| O5   | -5.3753462797 | -0.0183558207 | 1.8000443011  |
| C6   | -5.7413948389 | 0.8508975776  | 1.1365065248  |
| O7   | -4.2036997198 | 3.9498824822  | 1.2873149174  |
| C8   | -5.0428000926 | 3.2703950595  | 0.8856180733  |
| O9   | -8.5171125505 | 3.2507912547  | 1.9583202919  |
| C10  | -7.6733392842 | 2.8953219266  | 1.2654110743  |
| O11  | -6.0978642597 | 0.9649930476  | -4.9433495594 |
| C12  | -5.9147353833 | 0.9986332061  | -3.8028196379 |
| N13  | -2.6477074894 | -1.0944305656 | -2.8469986722 |
| C14  | -1.5262678512 | -1.9266536788 | -3.3028133908 |
| H15  | -1.6136033925 | -2.9252691617 | -2.8667881506 |
| H16  | -1.4813052531 | -2.0272996984 | -4.4004898617 |
| H17  | -0.5853020467 | -1.4912698676 | -2.9561470115 |
| C18  | -3.9383961462 | -1.6892511298 | -3.1795825924 |
| H19  | -3.8590038095 | -2.7770351131 | -3.0860630447 |
| H20  | -4.2566877089 | -1.4768376467 | -4.2175820548 |
| C21  | -2.5212660784 | 0.2864942469  | -3.3043739189 |
| H22  | -2.8811169963 | 0.4366690731  | -4.3396553675 |
| H23  | -1.4630495475 | 0.5664375020  | -3.2850045421 |
| P24  | -5.3076768170 | -1.1611490713 | -2.0254868756 |
| P25  | -3.4097465684 | 1.4753656704  | -2.1741527816 |
| C26  | -6.7313515924 | -2.1084329809 | -2.7150449631 |
| H27  | -7.0014900300 | -1.7233056218 | -3.7013971731 |
| H28  | -6.4792861997 | -3.1699757631 | -2.8010495552 |
| H29  | -7.5926367980 | -1.9993021000 | -2.0527499610 |
| C30  | -4.9127187198 | -2.0934588312 | -0.4874359587 |
| H31  | -4.7831682980 | -3.1532632255 | -0.7281378982 |
| H32  | -3.9939490527 | -1.7161554148 | -0.0359344851 |
| H33  | -5.7235576613 | -1.9908284369 | 0.2351443525  |
| C34  | -2.8668123093 | 3.1040735336  | -2.8572861988 |



|     |               |              |               |
|-----|---------------|--------------|---------------|
| H35 | -3.3523141811 | 3.2964816415 | -3.8178154181 |
| H36 | -3.1273882215 | 3.9077767337 | -2.1622916124 |
| H37 | -1.7816594321 | 3.1246779320 | -2.9971698391 |
| C38 | -2.4078086024 | 1.3230595589 | -0.6342565094 |
| H39 | -1.3430868294 | 1.4340439844 | -0.8634863171 |
| H40 | -2.6969242463 | 2.0900580329 | 0.0849667799  |
| H41 | -2.5706866081 | 0.3409304974 | -0.1880636230 |
| C42 | -7.9222305125 | 3.9061424540 | -2.4796035395 |
| H43 | -8.3668168171 | 4.5507739547 | -1.7166877171 |
| H44 | -7.6723552187 | 4.5013783675 | -3.3609334789 |
| C45 | -9.1484554854 | 1.7643114827 | -1.7065000949 |
| H46 | -9.8490948561 | 1.0057080224 | -2.0651016894 |
| H47 | -9.6248874981 | 2.2790003973 | -0.8668299826 |
| C48 | -8.8278422516 | 2.7312009027 | -2.8469976915 |
| H49 | -9.7708545147 | 3.1615636362 | -3.2085465081 |
| H50 | -8.3945322843 | 2.1821183808 | -3.6881230828 |
| H53 | -5.5393401236 | 4.3791139938 | -1.9761148480 |

Cartesian coordinates of **Figure S2c**

**E (M06/LACV3P\*\*++ 2f(Fe)) = -2917.88413161487**

**ZPE (kcal mol<sup>-1</sup>) = 319.799**

**G<sub>solv</sub> = -0.062562**

**DH<sub>298</sub> (kcal mol<sup>-1</sup>) = 25.389**

**DS<sub>298</sub> (cal K<sup>-1</sup> mol<sup>-1</sup>) = 237.469**

| atom | x             | y             | z             |
|------|---------------|---------------|---------------|
| S1   | -5.2329670063 | 3.4222327001  | -2.2988560141 |
| Fe2  | -5.2650556541 | 1.0992363413  | -2.2660611593 |
| S3   | -7.5153215816 | 1.4703135275  | -1.8414872895 |
| Fe4  | -6.1781755023 | 2.6705897043  | -0.3539692956 |
| O5   | -7.0337135900 | 0.8230660164  | 1.7501162211  |
| C6   | -6.6694016250 | 1.5270167257  | 0.9137636171  |
| O7   | -3.7644820605 | 3.5179686044  | 1.0620096727  |
| C8   | -4.7186041713 | 3.1342637263  | 0.5233194744  |
| O9   | -7.9927579167 | 4.8780273798  | 0.3658119992  |
| C10  | -7.2928739273 | 4.0155732777  | 0.0661471188  |
| O11  | -5.4034600036 | 0.3770047518  | -5.0868192246 |
| C12  | -5.3278535403 | 0.6496695466  | -3.9651978008 |
| N13  | -2.8642556583 | -1.8967755934 | -2.1121780595 |
| C14  | -1.9803745152 | -3.0618591794 | -2.2391055763 |
| H15  | -2.3475839512 | -3.8690210606 | -1.5997345325 |
| H16  | -1.9096869846 | -3.4405292235 | -3.2732329978 |
| H17  | -0.9757180495 | -2.7957535730 | -1.8990915951 |
| C18  | -4.2484524702 | -2.2228461288 | -2.4461349115 |
| H19  | -4.4647863853 | -3.2346438382 | -2.0886999826 |
| H20  | -4.4426874316 | -2.2142717641 | -3.5350709964 |

|     |               |               |               |
|-----|---------------|---------------|---------------|
| C21 | -2.3568136461 | -0.7483402820 | -2.8545441585 |
| H22 | -2.5989575372 | -0.7888308546 | -3.9336571107 |
| H23 | -1.2653918726 | -0.7290126593 | -2.7682155896 |
| P24 | -5.4796111842 | -1.0950024654 | -1.6085211001 |
| P25 | -2.9792891912 | 0.8721098945  | -2.1684288923 |
| C26 | -7.0650615720 | -1.9089276840 | -2.0793573533 |
| H27 | -7.2370945348 | -1.7934614992 | -3.1526513227 |
| H28 | -7.0390879250 | -2.9737967758 | -1.8281521970 |
| H29 | -7.8945475026 | -1.4350392501 | -1.5510888932 |
| C30 | -5.2644927953 | -1.5826706040 | 0.1561126781  |
| H31 | -5.3128947558 | -2.6721887106 | 0.2493000480  |
| H32 | -4.2943044615 | -1.2404411642 | 0.5200131115  |
| H33 | -6.0473098362 | -1.1403692428 | 0.7720357567  |
| C34 | -2.0584904479 | 2.0552753952  | -3.2510118377 |
| H35 | -2.4613935930 | 2.0200614469  | -4.2665380634 |
| H36 | -2.1770901551 | 3.0732638863  | -2.8734017384 |
| H37 | -0.9911862707 | 1.8153457314  | -3.2787323062 |
| C38 | -2.0518312622 | 0.9622847005  | -0.5756744571 |
| H39 | -0.9741512091 | 0.8921277649  | -0.7555954915 |
| H40 | -2.2696791594 | 1.8922610617  | -0.0493657099 |
| H41 | -2.3553542431 | 0.1267130276  | 0.0584303481  |
| C42 | -6.4108739013 | 4.3357358071  | -3.3948545501 |
| H43 | -6.8682137227 | 5.1159811709  | -2.7806119626 |
| H44 | -5.8071481399 | 4.8093893881  | -4.1731177057 |
| C45 | -8.3377320653 | 2.6580165379  | -3.0097124692 |
| H46 | -9.0657906674 | 2.0523867324  | -3.5565986367 |
| H47 | -8.8994498154 | 3.3598799613  | -2.3854675315 |
| C48 | -7.4495663469 | 3.4001434010  | -4.0089008018 |
| H49 | -8.0994142713 | 4.0133137492  | -4.6477517976 |
| H50 | -6.9537828486 | 2.6846021450  | -4.6717030231 |
| H53 | -4.1438538655 | 4.4064901699  | -2.0592514719 |
| H52 | -2.3200244260 | 5.5738840636  | -2.1284092853 |
| H55 | -2.9484230993 | 5.3194669974  | -0.6236231983 |
| N55 | -3.1838584999 | 5.5440841716  | -1.5900732649 |
| C55 | -5.4289730663 | 9.1150954603  | -1.9306647905 |
| C56 | -5.5031411961 | 8.3490338315  | -0.7665357531 |
| C57 | -4.7449710386 | 7.1843743673  | -0.6381760269 |
| C58 | -3.9066264874 | 6.7902964269  | -1.6841419152 |
| C59 | -3.8269182461 | 7.5513025600  | -2.8528878879 |
| C60 | -4.5875212986 | 8.7148969844  | -2.9698439938 |
| H61 | -6.0178072418 | 10.0220150499 | -2.0248823980 |
| H62 | -6.1486400774 | 8.6581874034  | 0.0498775433  |
| H63 | -4.7977304828 | 6.5943145738  | 0.2735309279  |
| H64 | -3.1690989491 | 7.2444848297  | -3.6631279639 |

H65 -4.5174692451 9.3104920438 -3.8750016436

Cartesian coordinates of **Figure S3**

**E (M06/LACV3P\*\*++ 2f(Fe)) = -2630.38871729887**

**ZPE (kcal mol<sup>-1</sup>) = 244.794**

**G<sub>solv</sub> = -0.0633896**

**DH<sub>298</sub> (kcal mol<sup>-1</sup>) = 21.838**

**DS<sub>298</sub> (cal K<sup>-1</sup> mol<sup>-1</sup>) = 208.434**

| atom | x             | y             | z             |
|------|---------------|---------------|---------------|
| S1   | -5.9779868027 | 3.6080894996  | -1.5991946512 |
| Fe2  | -5.5843896235 | 1.2376507036  | -1.9771262514 |
| S3   | -7.8259720288 | 0.8792704222  | -1.5090636787 |
| Fe4  | -6.6573491982 | 1.8446911623  | 0.2244021766  |
| O5   | -7.2549463521 | -0.5667865535 | 1.7428968503  |
| C6   | -7.0063470204 | 0.3927540021  | 1.1594017995  |
| O7   | -4.0085480884 | 2.0171082148  | 1.4841419135  |
| C8   | -5.0248677411 | 1.9627072533  | 0.9364449172  |
| O9   | -8.5072838416 | 3.4957221883  | 1.8326658064  |
| C10  | -7.8030988137 | 2.8544458121  | 1.1890517628  |
| O11  | -6.0087695528 | 1.0279969790  | -4.8579924265 |
| C12  | -5.8018275969 | 1.1228995587  | -3.7260114359 |
| N13  | -2.5519458184 | -0.9676414178 | -2.8481774716 |
| C14  | -1.4654118077 | -1.8152113048 | -3.3581156554 |
| H15  | -1.4800854367 | -2.7771507283 | -2.8389601020 |
| H16  | -1.5371625867 | -2.0027308843 | -4.4428761709 |
| H17  | -0.5037918962 | -1.3379725305 | -3.1517966903 |
| C18  | -3.8542807182 | -1.6086681930 | -2.9983318913 |
| H19  | -3.7413351273 | -2.6799559092 | -2.8031783075 |
| H20  | -4.2749528088 | -1.5061497204 | -4.0163114721 |
| C21  | -2.5099401653 | 0.3735222600  | -3.4198308913 |
| H22  | -2.9841357904 | 0.4345777877  | -4.4174314029 |
| H23  | -1.4635461777 | 0.6704364783  | -3.5434062049 |
| P24  | -5.1071065326 | -0.9859143825 | -1.7644204525 |
| P25  | -3.2936681588 | 1.6595654739  | -2.3141433598 |
| C26  | -6.4947643442 | -2.1650027560 | -2.0359110603 |
| H27  | -6.9418052223 | -1.9975990743 | -3.0188308331 |
| H28  | -6.1300767947 | -3.1947968672 | -1.9714691328 |
| H29  | -7.2699036142 | -2.0135191581 | -1.2824284838 |
| C30  | -4.3689447150 | -1.5494286341 | -0.1716664208 |
| H31  | -4.0365226899 | -2.5883359219 | -0.2621997706 |
| H32  | -3.5123886889 | -0.9269156879 | 0.0889156887  |
| H33  | -5.1085899701 | -1.4875052152 | 0.6273403455  |
| C34  | -2.9825680142 | 3.1814424974  | -3.3170308821 |
| H35  | -3.6156257566 | 3.1841640090  | -4.2082024379 |
| H36  | -3.2094287696 | 4.0750530187  | -2.7313842295 |

|     |               |              |               |
|-----|---------------|--------------|---------------|
| H37 | -1.9335952919 | 3.2253784518 | -3.6256663104 |
| C38 | -2.0352070685 | 1.8069350711 | -0.9732721933 |
| H39 | -1.0569126103 | 2.0286408543 | -1.4112214061 |
| H40 | -2.3014781887 | 2.6019506382 | -0.2756774672 |
| H41 | -1.9685173366 | 0.8687497825 | -0.4194868101 |
| C42 | -7.6403344717 | 4.3013524761 | -2.0736361450 |
| H43 | -8.1801277292 | 4.5300158073 | -1.1523129689 |
| H44 | -7.4201373779 | 5.2342089479 | -2.5967803509 |
| C45 | -8.9918031768 | 2.1088325136 | -2.2652463328 |
| H46 | -9.5757822948 | 1.5278252842 | -2.9842950814 |
| H47 | -9.6708026040 | 2.4084595311 | -1.4605857026 |
| C48 | -8.4164294769 | 3.3383220274 | -2.9669045338 |
| H49 | -9.2596335507 | 3.9052734955 | -3.3829886155 |
| H50 | -7.8040587974 | 3.0425397938 | -3.8255293736 |
| H53 | -5.9206363265 | 4.0081666099 | -0.3022309185 |

---

(<sup>i</sup>) a) A. D. Becke, *J. Chem. Phys.* **1993**, 98, 5648-5652; b) C. Lee, W. Yang, R. G. Parr, *Phys. Rev. B* 1988, **37**, 785-789.

(<sup>ii</sup>) Y. Zhao, D. G. Truhlar, *Theor. Chem. Acc.* **2006**, 120, 215-241.

(<sup>iii</sup>) J.M.L. Martin and A. Sundermann, *J.Chem.Phys.*, **2001**, 114, 3408-3420

(<sup>iv</sup>) B.Marten, K. Kim, C. Cortis, R. A. Friesner, R. B. Murphy, M. N. Ringnalda, D. Sitkoff and B. Honig, *J. Phys. Chem.*, **1996**, 100, 11775-11788.
